# Supplementary material
Source: Springer Nature journal article supplement (https://www.springermedizin.de/resource/supplementary/12990_2009_204_MOESM3_ESM.pdf/9612784)

% of predrug control

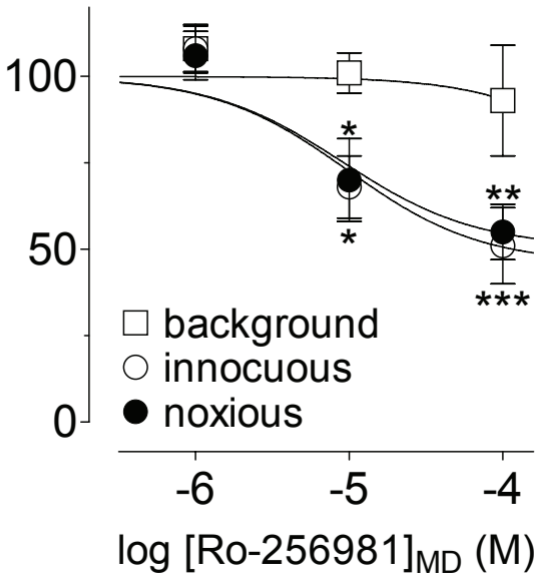

Supplement: MOESM3 [file 9612784]
